# Supplementary material for: Emissive cyanide-bridged bimetallic compounds as building blocks for polymeric antennae
Source: Royal Society of Chemistry journal article supplement (doi:10.1039/c3dt51164b), 2013-01-01
Supplement: c3dt51164b.pdf [file c3dt51164b.pdf]

| L   | X                                         | Compound              | Reference |
|-----|-------------------------------------------|-----------------------|-----------|
| tpy | CN <sup>-</sup>                           | <b>1a</b>             | [9]       |
|     | NCS <sup>-</sup>                          | <b>2a</b>             | [9]       |
|     | (μ-NC)Fe <sup>III</sup> (CN) <sub>5</sub> | <b>3a</b>             | [9]       |
|     | (μ-NC)Fe <sup>II</sup> (CN) <sub>5</sub>  | <b>3a<sup>r</sup></b> | [9]       |
|     | (μ-NC)Cr <sup>III</sup> (CN) <sub>5</sub> | <b>4a</b>             | [9]       |
|     | (μ-NC)Ru <sup>II</sup> (CN) <sub>5</sub>  | <b>5a<sup>r</sup></b> | this work |
|     | (μ-NC)Os <sup>III</sup> (CN) <sub>5</sub> | <b>6a</b>             | this work |
|     | (μ-NC)Os <sup>II</sup> (CN) <sub>5</sub>  | <b>6a<sup>r</sup></b> | this work |
|     | (μ-NC)Ru(py) <sub>4</sub> (CN)            | <b>7a<sup>r</sup></b> | this work |
| tpm | CN <sup>-</sup>                           | <b>1b</b>             | [9]       |
|     | NCS <sup>-</sup>                          | <b>2b</b>             | [9]       |
|     | (μ-NC)Fe <sup>III</sup> (CN) <sub>5</sub> | <b>3b</b>             | [9]       |
|     | (μ-NC)Fe <sup>II</sup> (CN) <sub>5</sub>  | <b>3b<sup>r</sup></b> | [9]       |
|     | (μ-NC)Cr <sup>III</sup> (CN) <sub>5</sub> | <b>4b</b>             | [9]       |
|     | (μ-NC)Ru <sup>II</sup> (CN) <sub>5</sub>  | <b>5b<sup>r</sup></b> | this work |
|     | (μ-NC)Os <sup>III</sup> (CN) <sub>5</sub> | <b>6b</b>             | this work |
|     | (μ-NC)Os <sup>II</sup> (CN) <sub>5</sub>  | <b>6b<sup>r</sup></b> | this work |
|     | (μ-NC)Ru(py) <sub>4</sub> (CN)            | <b>7b<sup>r</sup></b> | this work |

**Table S1.** Complexes of the formula [Ru(L)(bpy)(X)] studied in this work.

| Compound                          | <b>6a</b>                                                              | <b>7a<sup>r</sup></b>                                                                                         | <b>6b</b>                                                            |
|-----------------------------------|------------------------------------------------------------------------|---------------------------------------------------------------------------------------------------------------|----------------------------------------------------------------------|
| Empirical Formula                 | C <sub>55</sub> H <sub>39</sub> N <sub>11</sub> O <sub>4.5</sub> PRuOs | C <sub>47</sub> H <sub>38</sub> N <sub>11</sub> O <sub>3</sub> P <sub>2</sub> F <sub>12</sub> Ru <sub>2</sub> | C <sub>50</sub> H <sub>38</sub> N <sub>14</sub> O <sub>5</sub> PRuOs |
| fw / g mol <sup>-1</sup>          | 1248,21                                                                | 1296,96                                                                                                       | 1237,18                                                              |
| T / K                             | 298 (2)                                                                | 298 (2)                                                                                                       | 298 (2)                                                              |
| λ / Å                             | 0,71069                                                                | 0,71069                                                                                                       | 0,71069                                                              |
| Cell                              | triclinic                                                              | monoclinic                                                                                                    | triclinic                                                            |
| Space Group                       | P-1                                                                    | P121/n1                                                                                                       | P-1                                                                  |
| a / Å                             | 12,9482(5)                                                             | 13,8415(11)                                                                                                   | 11,1651(3)                                                           |
| b / Å                             | 13,3888(5)                                                             | 17,7504(11)                                                                                                   | 13,4550(3)                                                           |
| c / Å                             | 17,3370(6)                                                             | 22,213(2)                                                                                                     | 19,2621(5)                                                           |
| α / °                             | 101,641(3)                                                             | 90,0                                                                                                          | 88,288(2)                                                            |
| β / °                             | 96,360(3)                                                              | 101,602(9)                                                                                                    | 76,516(2)                                                            |
| γ / °                             | 114,494(4)                                                             | 90,0                                                                                                          | 81,877(2)                                                            |
| V / Å <sup>3</sup>                | 2614,29(17)                                                            | 5346,1(6)                                                                                                     | 2785,67(12)                                                          |
| Z                                 | 2                                                                      | 4                                                                                                             | 2                                                                    |
| dens <sub>calc</sub>              | 1,586                                                                  | 1,611                                                                                                         | 1,475                                                                |
| μ (abs. coef.) / mm <sup>-1</sup> | 2,805                                                                  | 0,718                                                                                                         | 2,634                                                                |
| final index (R1)                  | 0,0375                                                                 | 0,0998                                                                                                        | 0,0491                                                               |
| I>2σ(I) (wR2)                     | 0,0993                                                                 | 0,2135                                                                                                        | 0,1006                                                               |
| all data (R1)                     | 0,0535                                                                 | 0,2242                                                                                                        | 0,1126                                                               |
| all data (wR2)                    | 0,1113                                                                 | 0,2951                                                                                                        | 0,1105                                                               |

**Table S2.** Crystallographic data for compounds **6a-b** and **7a<sup>r</sup>**.

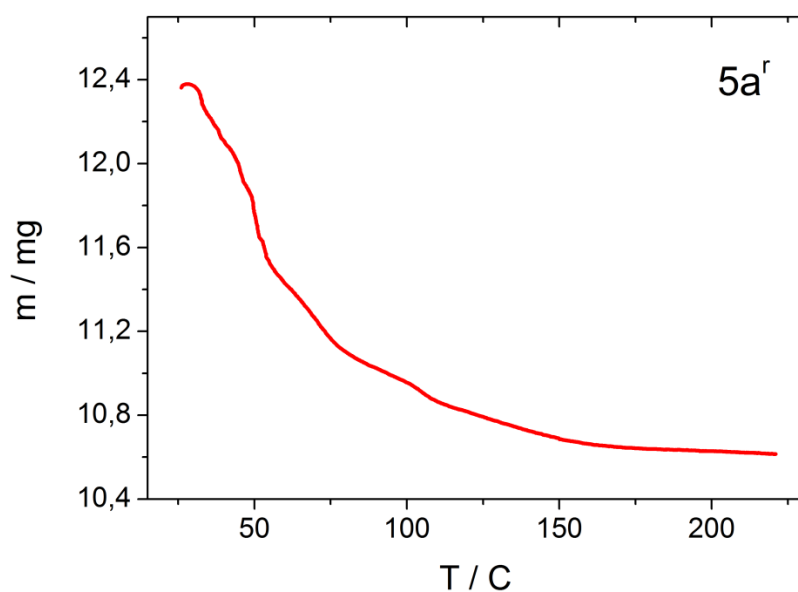

**Figure S1.** Thermogravimetric analysis for complex **5a<sup>r</sup>**. Initial mass = 12.38 mg. Final mass = 10.62 mg. Loss = 14%.

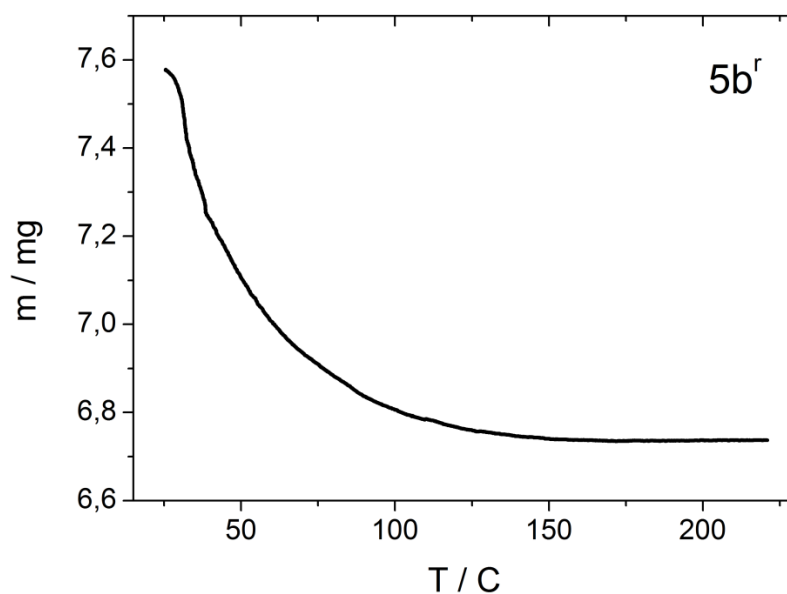

**Figure S2.** Thermogravimetric analysis for complex **5b<sup>r</sup>**. Initial mass = 7.58 mg. Final mass = 6.74 mg. Loss = 11%.

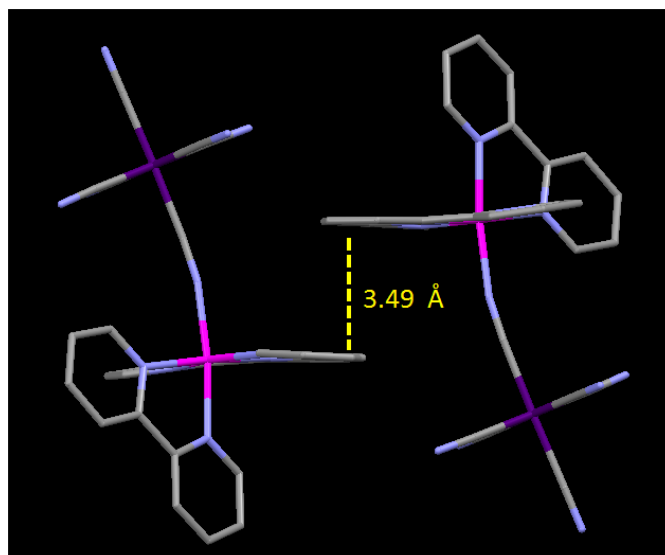

**Figure S3.** Tpy - tpy  $\pi$  stacking interactions in the crystal structure of **6a**. Hydrogen atoms, counter ions, and solvent molecules were omitted for clarity.

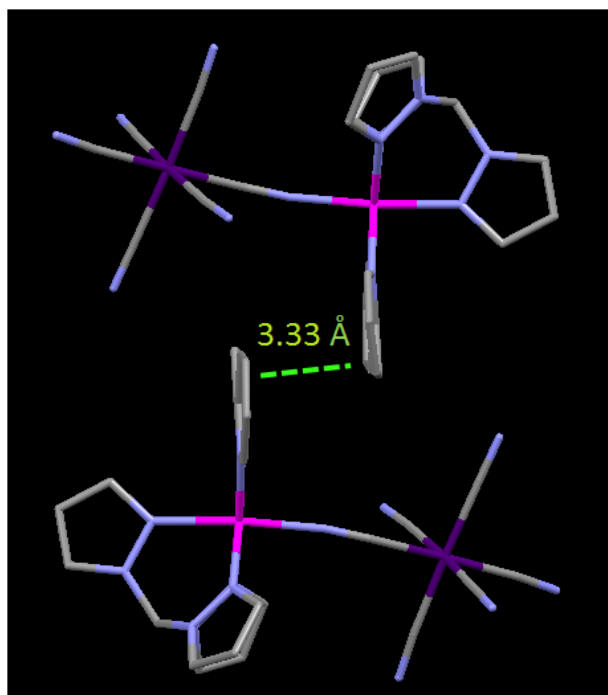

**Figure S4.** Bpy - bpy  $\pi$  stacking interactions in the crystal structure of **6b**. Hydrogen atoms, counter ions, and solvent molecules were omitted for clarity.

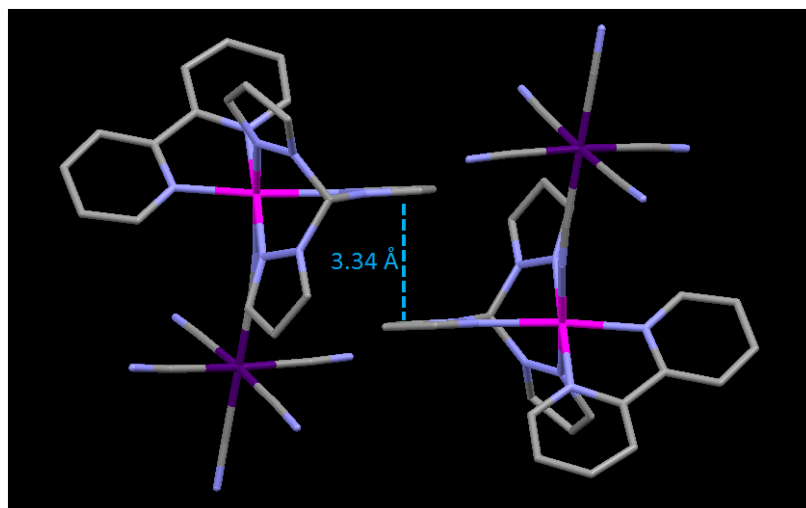

**Figure S5.** Tpm - tpm  $\pi$  stacking interactions in the crystal structure of **6b**. Hydrogen atoms, counter ions, and solvent molecules were omitted for clarity.

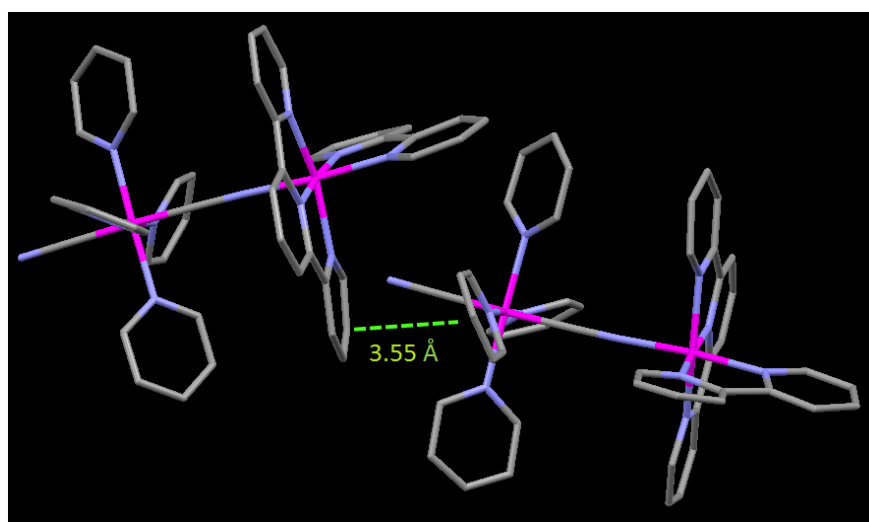

**Figure S6.** Tpy - py  $\pi$  stacking interactions in the crystal structure of **7a'**. Hydrogen atoms, counter ions, and solvent molecules were omitted for clarity.

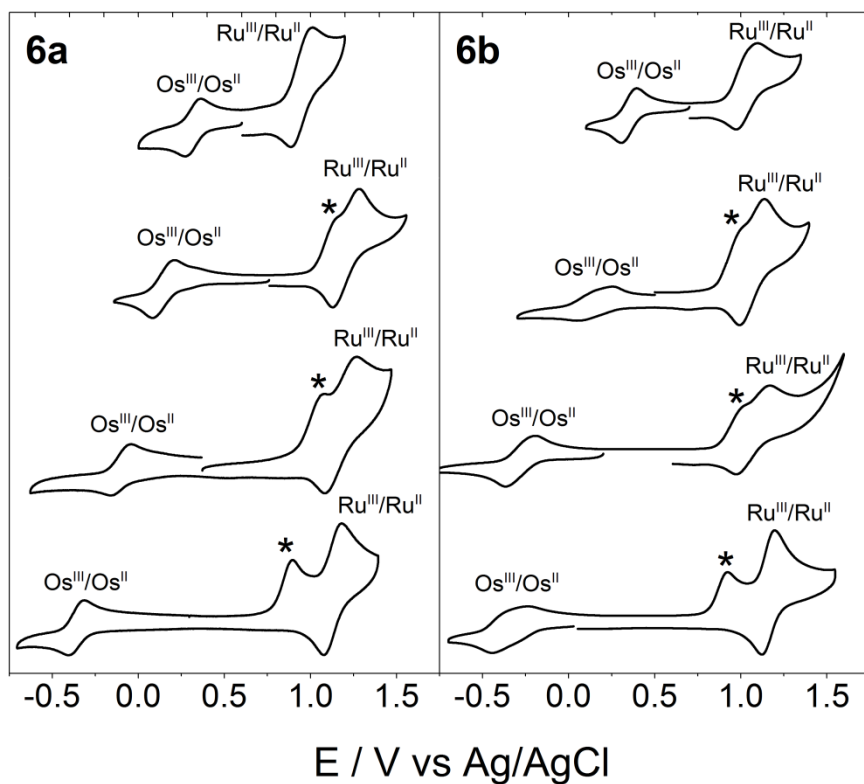

**Figure S7.** Electrochemistry of **6a-b** in water, methanol, ethanol and acetonitrile (from top to bottom). The wave labeled with a (\*) is preliminarily assigned to a  $\text{Os}^{\text{IV}}/\text{Os}^{\text{III}}$  process.

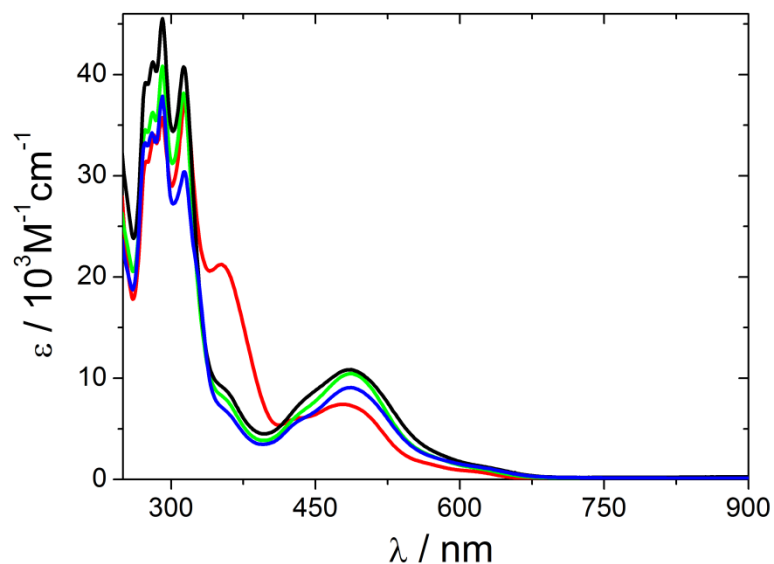

**Figure S8.** UV-vis absorption of the complexes **5a<sup>r</sup>** (green), and **6a<sup>r</sup>** (black) in water and **7a<sup>r</sup>** in acetonitrile (red). For comparison purposes the spectrum of  $[\text{Ru}(\text{tpy})(\text{bpy})(\text{NCS})]^+$  in acetonitrile (blue) is also included.

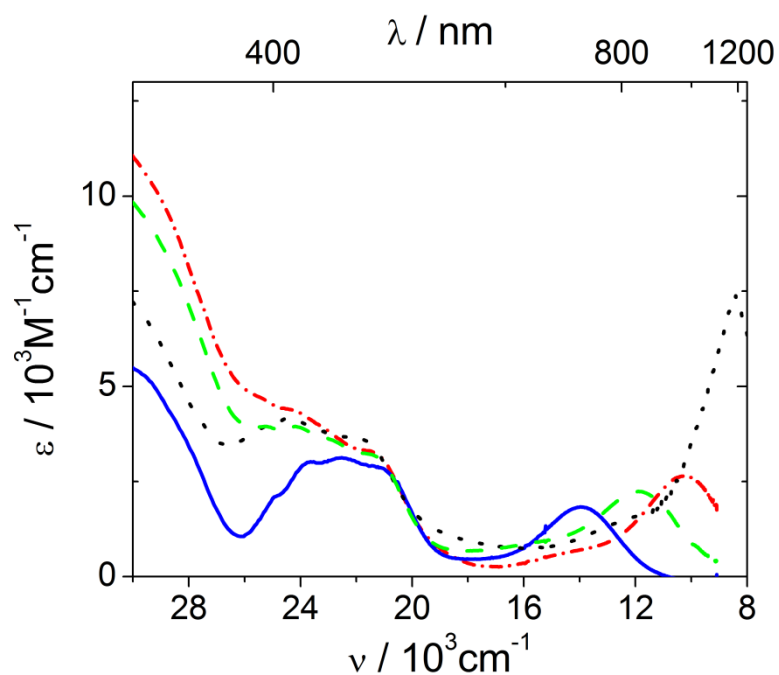

**Figure S9.** Vis-NIR absorption of the complexes **6b** in water (black dotted line), methanol (red dash-dotted), ethanol (green dashed line) and acetonitrile (blue solid line).

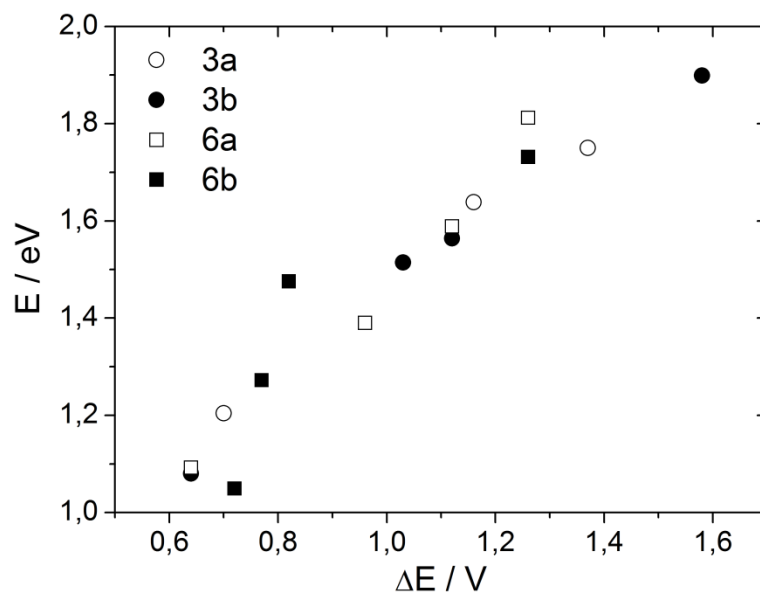

**Figure S10.** Correlation between the energy of the MM'CT band and the difference in the redox potentials of iron and ruthenium centers for compounds **3a-b**,<sup>9</sup> and **6a-b** in water, MeOH, EtOH and ACN.

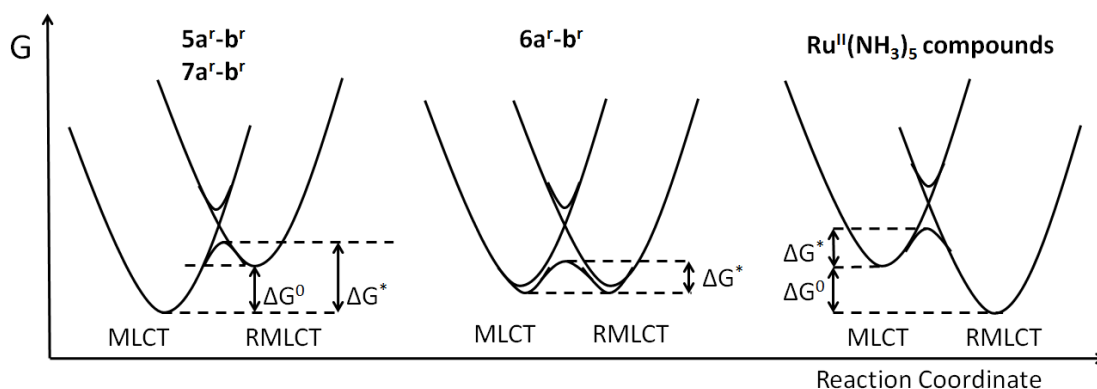

**Figure S11.** Excited state electron transfer energetics for complexes **5a<sup>r</sup>-b<sup>r</sup>**, **6a<sup>r</sup>-b<sup>r</sup>** and **7a<sup>r</sup>-b<sup>r</sup>**. **Ru(NH<sub>3</sub>)<sub>5</sub> compounds** are shown for comparison purposes.

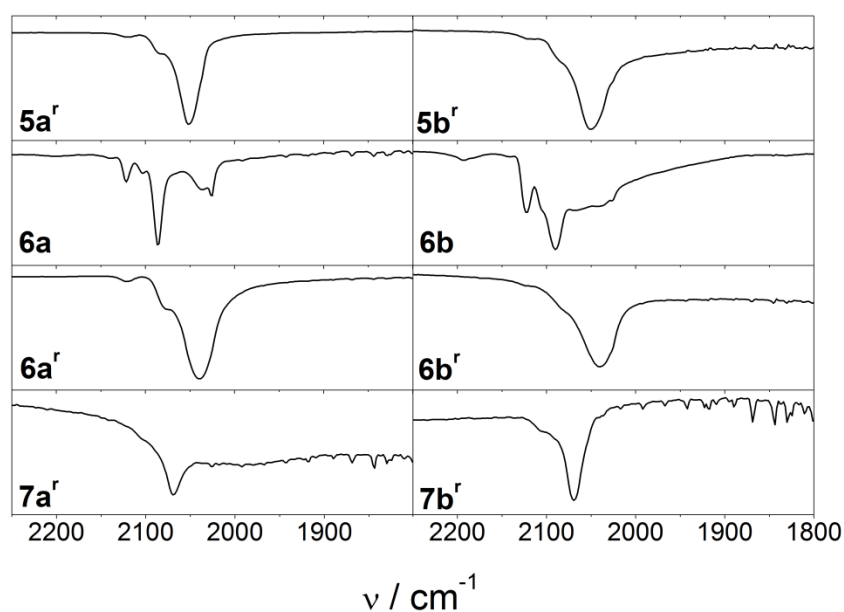

**Figure S12.** IR spectra in KBr pellets of **5a<sup>r</sup>-b<sup>r</sup>**, **6a-b**, **6a<sup>r</sup>-b<sup>r</sup>** and **7a<sup>r</sup>-b<sup>r</sup>**, from top to bottom.
